# Supplementary material
Source: bioRxiv or medRxiv preprint supplement (http://medrxiv.stage.highwire.org/highwire/filestream/96667/field_highwire_adjunct_files/3/2020.09.12.20193391-12.pdf)
Supplement: Supplementary file [file 2020.09.12.20193391-12.pdf]

**Supplemental Table 3:** Categories of Complications during Hospitalization

| Category       | Complication                                                                      |
|----------------|-----------------------------------------------------------------------------------|
| Cardiovascular | Hypotension (sustained SBP < 90)                                                  |
|                | Atrial fibrillation                                                               |
|                | Acute Heart Failure                                                               |
|                | Myocardial infarction                                                             |
|                | BNP (BNP > 450 after initial 48 hours of admission)                               |
|                | Troponemia (Troponin > 0.5 after initial 48 hours of admission)                   |
| Respiratory    | Pneumothorax                                                                      |
|                | Pulmonary Edema                                                                   |
|                | Acute respiratory distress syndrome                                               |
|                | Respiratory Failure                                                               |
|                | Healthcare associated pneumonia                                                   |
|                | Ventilator associated pneumonia                                                   |
| Hematologic    | In-hospital bleeding event                                                        |
|                | Cerebrovascular accident                                                          |
|                | Myocardial infarction                                                             |
|                | Pulmonary embolism                                                                |
|                | Deep venous thrombosis                                                            |
|                | Severe Anemia (Hgb < 6)                                                           |
| Renal          | Urinary tract infection                                                           |
|                | Acute Renal Failure                                                               |
|                | 1.0 point increase in creatinine from baseline after initial 48 hours in hospital |
| Metabolic      | Rhabdomyolysis                                                                    |
|                | Malnutrition                                                                      |
|                | Hypernatremia (>149)                                                              |
|                | Hyperkalemia (>5)                                                                 |
|                | Hypoglycemia (< 60)                                                               |
|                | Hyperglycemia (> 180)                                                             |
| Hepatic        | AST > 200 after initial 48 hours                                                  |
|                | Total bilirubin > 3 after initial 48 hours                                        |
| Infectious     | Bacteremia                                                                        |
|                | Clostridium difficile infection                                                   |
|                | Sepsis                                                                            |
|                | Urinary tract infection                                                           |
|                | Healthcare associated pneumonia                                                   |
|                | Ventilator associated pneumonia                                                   |

Supplementary Table 4: List of Complications contributing to each Complication category.

Abbreviations: SBP: systolic blood pressure, BNP: beta natriuretic peptide, Hgb: hemoglobin, AST: aspartate transaminase.
